# Supplementary material for: Moisture-driven Composite Battery from Waste Materials for Sustainable Energy Harvesting
Source: Research Square preprint supplement (doi:10.21203/rs.3.rs-8570579/v1), 2026-01-20
Supplement: Supplementary file 1 [file 502640dcad7d2be4dd549ac3.xlsx]

## Sheet: Figure 3a
Sample A			Sample B			Sample C			Sample D
Voc (V)	Isc (μA)		Voc (V)	Isc (μA)		Voc (V)	Isc (μA)		Voc (V)	Isc (μA)
0.93	0		0.77	0		0.91	0		0.77	0
1.12	1		1.16	2		1.01	0		0.79	1
0.71	4		0.72	5		0.73	1		0.75	2
0.71	33		0.67	47		0.72	9		0.71	18

## Sheet: Figure 3b
Sample	Distance (µm)		Voc (V)	Isc (μA)
Sample A	6000		0.71	33
Sample B	6000		0.67	47
Sample C	5000		0.72	9
Sample D	2850		0.71	18

## Sheet: Figure 3c
Day	Time (s)	Voc (V)
	X	Y
1	0	0.66
1	3600	0.63
1	7200	0.64
1	10800	0.63
1	14400	0.63
1	18000	0.6
1	21600	0.58
1	25200	0.45
1	28800	0.5
1	32400	0.29
1	36000	0.13
1	39600	0.03
1	43200	0.02
1	46800	0.003
1	50400	0.002
1	54000	0.14
1	57600	0.57
1	61200	0.9
1	64800	1.06
1	68400	1.16
1	72000	0.8
1	75600	0.73
1	79200	0.67
1	82800	0.68
1	86400	0.67
2	90000	0.64
2	93600	0.65
2	97200	0.64
2	100800	0.63
2	104400	0.61
2	108000	0.59
2	111600	0.47
2	115200	0.52
2	118800	0.3
2	122400	0.15
2	126000	0.05
2	129600	0.03
2	133200	0.003
2	136800	0.002
2	140400	0.22
2	144000	0.7
2	147600	0.95
2	151200	1.18
2	154800	1.24
2	158400	1.1
2	162000	1.02
2	165600	0.97
2	169200	0.93
2	172800	0.64
3	176400	0.65
3	180000	0.66
3	183600	0.66
3	187200	0.66
3	190800	0.65
3	194400	0.62
3	198000	0.59
3	201600	0.57
3	205200	0.58
3	208800	0.6
3	212400	0.63
3	216000	0.65
3	219600	0.67
3	223200	0.68
3	226800	0.78
3	230400	0.85
3	234000	0.9
3	237600	0.95
3	241200	1
3	244800	0.98
3	248400	0.94
3	252000	0.91
3	255600	0.87
3	259200	0.89
4	262800	0.86
4	266400	0.87
4	270000	0.86
4	273600	0.85
4	277200	0.83
4	280800	0.82
4	284400	0.8
4	288000	0.77
4	291600	0.74
4	295200	0.72
4	298800	0.7
4	302400	0.68
4	306000	0.65
4	309600	0.64
4	313200	0.66
4	316800	0.7
4	320400	0.85
4	324000	0.99
4	327600	1.08
4	331200	0.95
4	334800	0.98
4	338400	1.02
4	342000	0.92
4	345600	0.91
5	349200	0.89
5	352800	0.9
5	356400	0.88
5	360000	0.87
5	363600	0.86
5	367200	0.84
5	370800	0.82
5	374400	0.8
5	378000	0.77
5	381600	0.75
5	385200	0.73
5	388800	0.71
5	392400	0.68
5	396000	0.67
5	399600	0.69
5	403200	0.73
5	406800	0.88
5	410400	0.91
5	414000	1.12
5	417600	1.06
5	421200	0.91
5	424800	0.97
5	428400	0.94
5	432000	0.9
6	435600	0.88
6	439200	0.89
6	442800	0.87
6	446400	0.86
6	450000	0.84
6	453600	0.83
6	457200	0.81
6	460800	0.78
6	464400	0.76
6	468000	0.74
6	471600	0.72
6	475200	0.7
6	478800	0.67
6	482400	0.66
6	486000	0.68
6	489600	0.72
6	493200	0.87
6	496800	1
6	500400	0.99
6	504000	0.91
6	507600	1
6	511200	0.97
6	514800	0.94
6	518400	1.02
7	522000	0.98
7	525600	0.95
7	529200	0.92
7	532800	0.88
7	536400	0.85
7	540000	0.82
7	543600	0.78
7	547200	0.68
7	550800	0.62
7	554400	0.59
7	558000	0.57
7	561600	0.53
7	565200	0.5
7	568800	0.48
7	572400	0.45
7	576000	0.39
7	579600	0.3
7	583200	0.71
7	586800	0.74
7	590400	0.82
7	594000	0.85
7	597600	0.9
7	601200	0.91
7	604800	0.84
8	608400	0.81
8	612000	0.79
8	615600	0.79
8	619200	0.8
8	622800	0.74
8	626400	0.6
8	630000	0.59
8	633600	0.55
8	637200	0.39
8	640800	0.25
8	644400	0.25
8	648000	0.13
8	651600	0.07
8	655200	0.04
8	658800	0.02
8	662400	0.01
8	666000	0.11
8	669600	0.3
8	673200	0.4
8	676800	0.41
8	680400	0.67
8	684000	0.7
8	687600	0.71
8	691200	0.65
9	694800	0.63
9	698400	0.65
9	702000	0.7
9	705600	0.8
9	709200	0.74
9	712800	0.65
9	716400	0.6
9	720000	0.51
9	723600	0.3
9	727200	0.14
9	730800	0.05
9	734400	0.03
9	738000	0.02
9	741600	0.01
9	745200	0.22
9	748800	0.45
9	752400	0.79
9	756000	0.8
9	759600	0.81
9	763200	0.92
9	766800	1.01
9	770400	0.95
9	774000	0.92

## Sheet: Figure 3d
Day+C32C6A1:B207	Time (s)	Isc (μA)
	X	Y
1	0	1.07
1	3600	12.12
1	7200	1.49
1	10800	19.54
1	14400	26.53
1	18000	30.15
1	21600	31.74
1	25200	37.32
1	28800	14.08
1	32400	34.28
1	36000	51.41
1	39600	62.75
1	43200	67.34
1	46800	69.19
1	50400	69.76
1	54000	18.87
1	57600	3.09
1	61200	1.47
1	64800	1.49
1	68400	1.5
1	72000	15.51
1	75600	21.61
1	79200	26
1	82800	9.29
1	86400	1.47
2	90000	20.62
2	93600	3.59
2	97200	23.15
2	100800	30.42
2	104400	33.68
2	108000	35.41
2	111600	39.96
2	115200	14.5
2	118800	35.35
2	122400	51.74
2	126000	62.27
2	129600	66.97
2	133200	69.08
2	136800	69.72
2	140400	19.25
2	144000	3.39
2	147600	1.46
2	151200	1.49
2	154800	1.5
2	158400	5.78
2	162000	14.49
2	165600	17.31
2	169200	19.45
2	172800	1.94
3	176400	1.32
3	180000	1.19
3	183600	1.09
3	187200	20.39
3	190800	41.88
3	194400	55.44
3	198000	64.16
3	201600	68.2
3	205200	17.76
3	208800	1.49
3	212400	1.29
3	216000	1.16
3	219600	1.08
3	223200	1.02
3	226800	1.02
3	230400	1.08
3	234000	1.16
3	237600	1.27
3	241200	1.43
3	244800	1.48
3	248400	8.1
3	252000	16.03
3	255600	21.01
3	259200	4.5
4	262800	22.44
4	266400	4.98
4	270000	22.93
4	273600	29.96
4	277200	34.03
4	280800	37
4	284400	40.19
4	288000	44.7
4	291600	49.84
4	295200	54.08
4	298800	58.11
4	302400	62.15
4	306000	67.55
4	309600	69.26
4	313200	18.12
4	316800	1.51
4	320400	1.36
4	324000	1.35
4	327600	1.45
4	331200	13.4
4	334800	3.25
4	338400	2.73
4	342000	17.3
4	345600	2.94
5	349200	21.84
5	352800	4.36
5	356400	23.59
5	360000	31.24
5	363600	35.05
5	367200	37.92
5	370800	41.67
5	374400	45.23
5	378000	50.05
5	381600	54.17
5	385200	58.15
5	388800	62.18
5	392400	67.56
5	396000	69.26
5	399600	18.12
5	403200	1.51
5	406800	1.36
5	410400	1.27
5	414000	1.43
5	417600	1.48
5	421200	18.92
5	424800	4.93
5	428400	19.16
5	432000	3.81
6	435600	20.89
6	439200	4.54
6	442800	21.58
6	446400	28.52
6	450000	32.74
6	453600	35.95
6	457200	39.49
6	460800	43.9
6	464400	48.75
6	468000	53.2
6	471600	57.62
6	475200	62.15
6	478800	67.55
6	482400	69.26
6	486000	18.06
6	489600	1.51
6	493200	1.37
6	496800	1.46
6	500400	3.47
6	504000	17.84
6	507600	13.28
6	511200	14.11
6	514800	17.46
6	518400	23.48
7	522000	22.14
7	525600	19.3
7	529200	15.91
7	532800	10.79
7	536400	3.69
7	540000	1.98
7	543600	1.45
7	547200	1.39
7	550800	1.33
7	554400	1.26
7	558000	1.2
7	561600	1.14
7	565200	1.08
7	568800	1.03
7	572400	0.96
7	576000	0.88
7	579600	0.8
7	583200	0.73
7	586800	0.66
7	590400	0.6
7	594000	0.55
7	597600	0.51
7	601200	0.48
7	604800	1.19
8	608400	1.41
8	612000	2.65
8	615600	1.54
8	619200	1.48
8	622800	8.25
8	626400	18.94
8	630000	22.44
8	633600	25.3
8	637200	33.62
8	640800	43.68
8	644400	47.3
8	648000	55.32
8	651600	62.04
8	655200	66.42
8	658800	68.91
8	662400	69.67
8	666000	18.76
8	669600	2.38
8	673200	1.37
8	676800	1.26
8	680400	1.24
8	684000	1.24
8	687600	1.25
8	691200	1.21
9	694800	13.96
9	698400	2.04
9	702000	1.41
9	705600	1.35
9	709200	12.62
9	712800	21.43
9	716400	26.46
9	720000	31.81
9	723600	42.52
9	727200	54.11
9	730800	63
9	734400	67.09
9	738000	69.11
9	741600	69.73
9	745200	19.54
9	748800	2.98
9	752400	1.46
9	756000	1.39
9	759600	1.34
9	763200	1.37
9	766800	1.46
9	770400	1.48
9	774000	3.44

## Sheet: Figure 3e
FU %	Voc (V)
X	Y
0	0
10	0.22
20	0.62
30	0.82
40	0.81
50	0.79
60	0.78
70	0.77
80	0.74
90	0.72
100	0.71

## Sheet: Figure 3f
Time (hr)	Voc (V)
X	Y
12.00 AM	0.66
1.00 AM	0.63
2.00 AM	0.64
3.00 AM	0.64
4.00 AM	0.63
5.00 AM	0.6
6.00 AM	0.59
7.00 AM	0.46
8.00 AM	0.5
9.00 AM	0.29
10.00 AM	0.13
11.00 AM	0.03
12.00 PM	0.02
1.00 PM	0.002
2.00 PM	0.002
3.00 PM	0.14
4.00 PM	0.57
5.00 PM	0.9
6.00 PM	1.06
7.00 PM	1.12
8.00 PM	0.8
9.00 PM	0.73
10.00 PM	0.67
11.00 PM	0.69

## Sheet: Figure 3g
Time (s)	Temp (°C)																																		Time (s)	Temp (°C)
X	Y																																		X	Y
0	30																																		0	30
10	41																																		10	41
20	53																																		20	53
30	65																																		30	65
40	76																																		40	76
50	88																																		50	88
60	100																																		60	100
70	111																																		70	111
80	123																																		80	123
90	135																																		90	135
100	146																																		100	146
110	158																																		110	158
120	170																																		120	170
180	160																																		180	160
240	151																																		240	151
300	142																																		300	142
360	133																																		360	133
420	125																																		420	125
480	117																																		480	117
540	110																																		540	110
600	103																																		600	103
660	96																																		660	96
720	90																																		720	90
780	84																																		780	84
840	78																																		840	78
900	73																																		900	73
960	68																																		960	68
1020	64																																		1020	64
1080	60																																		1080	60
1140	56																																		1140	56
1200	53																																		1200	53
1260	50																																		1260	50
1320	47																																		1320	47
1380	45																																		1380	45
1440	43																																		1440	43
1500	42																																		1500	42
1560	41																																		1560	41
1620	40																																		1620	40
1680	40																																		1680	40
1740	40																																		1740	40
1800	30																																		1800	30

## Sheet: Figure 3h
Time (min)		Mass change (mg)
X		Y
0		0
60		0.02
120		0.04
180		0.07
240		0.08
300		0.1
360		0.12
420		0.14
480		0.18
540		0.2

## Sheet: Figure 3i
Time(s)	Accumulative Charge - Q (mC)
X	Y
0	0
30	0.05
180	0.33
360	0.56
540	0.75
720	0.94
900	1.17
1080	1.32
1260	1.6
1440	1.79
1620	1.93
1800	2.11
1980	2.26
2160	2.4
2340	2.54
2520	2.63
2700	2.77
2880	2.87
3060	2.96
3240	3.05
3420	3.15
3600	3.24
3780	3.34
3960	3.43
4140	3.52
4320	3.57
4500	3.67
4680	3.76
4860	3.81
5040	3.85
5220	3.9
5400	3.95
5580	3.99
5760	4.04
5940	4.09
6120	4.14
6300	4.18
6480	4.23
6660	4.23
6840	4.28
7020	4.28
7200	4.32
7380	4.32
7560	4.37
7740	4.37
7920	4.37
8100	4.37
8280	4.37
8460	4.42
8640	4.47
8820	4.51
9000	4.51

## Sheet: Figure 4a
Sample A
Isc(µA)	MA%
X	Y
0	5.55
1	8.33
2	11.11
8	13.89
17	22.22
28	27.78
91	41.67
155	47.22
208	61.11

[truncated: 29 more sheets: Figure 4b, Figure 4c, Figure 4d, Figure 4e, Figure 4f, Figure 4g, Figure 4h, Figure 5b, Figure 5c, Figure 5d, Figure 5e, Figure 5f, Figure 6a, Figure 6b, Figure 6c, Figure 6d, Figure S6, Figure S7, Figure S9, Figure S10 …]
